# Supplementary material for: Chemical characterization of atmospheric aerosols at a high-altitude mountain site: a study of source apportionment
Source: Copernicus journal article supplement (doi:10.5194/egusphere-2023-2346), 2023-10-16
Supplement: Supplementary file 1 [file egusphere-2023-2346-supplement.pdf]

## **Supplementary Materials**

A)

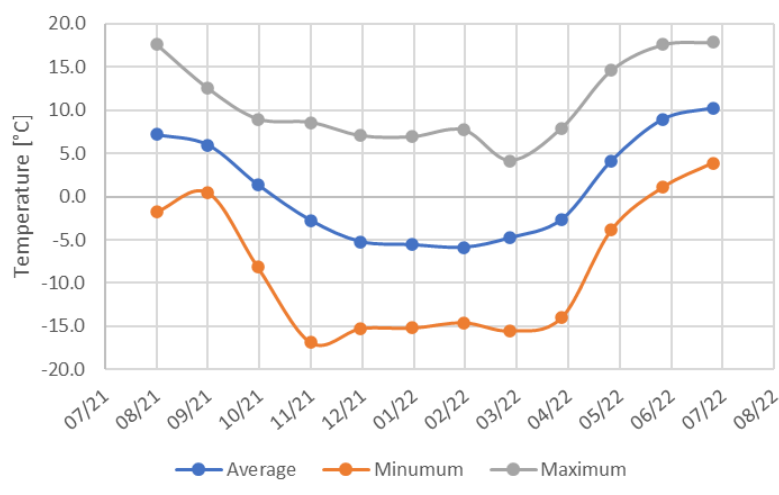

B)

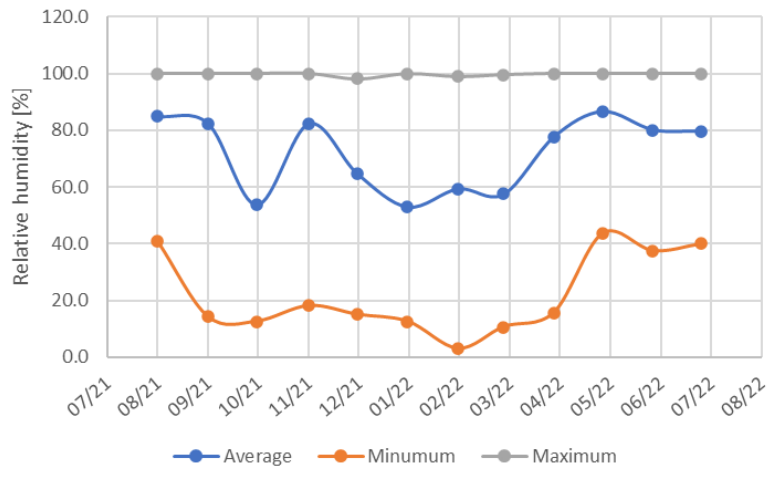

C)

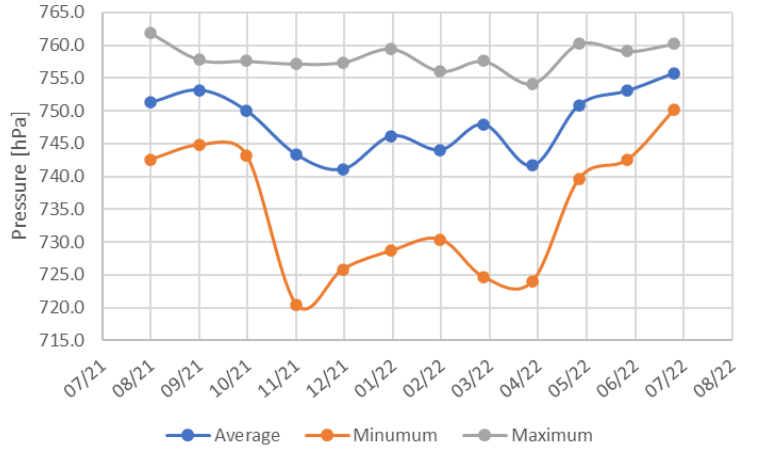

Figure S1: Average and extreme values of temperature (a), relative humidity (b) and pressure (c) data during the considered period.

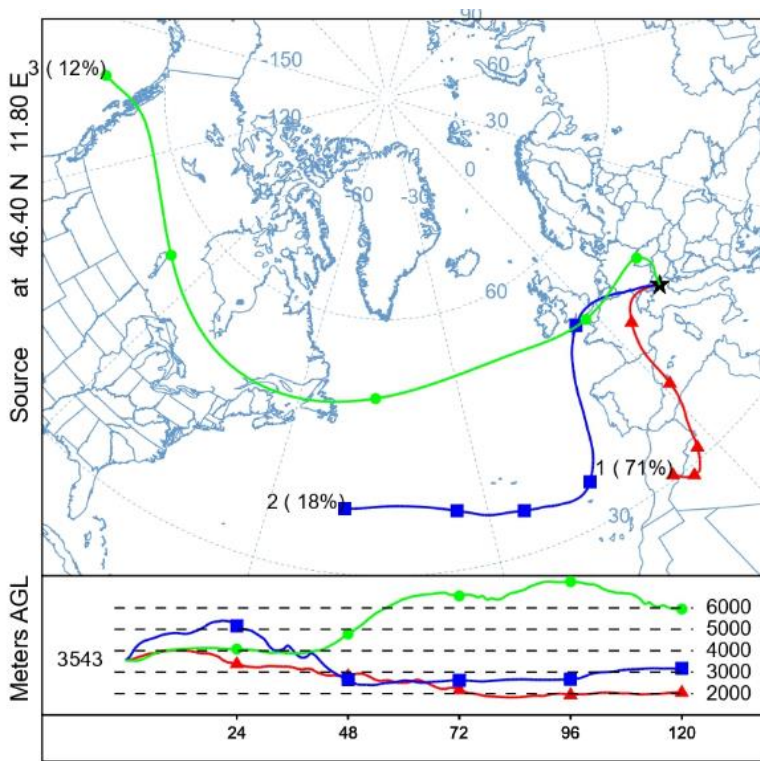

Figure S2. Cluster mean of back-trajectories during the Saharan Dust event of 15-19 March.

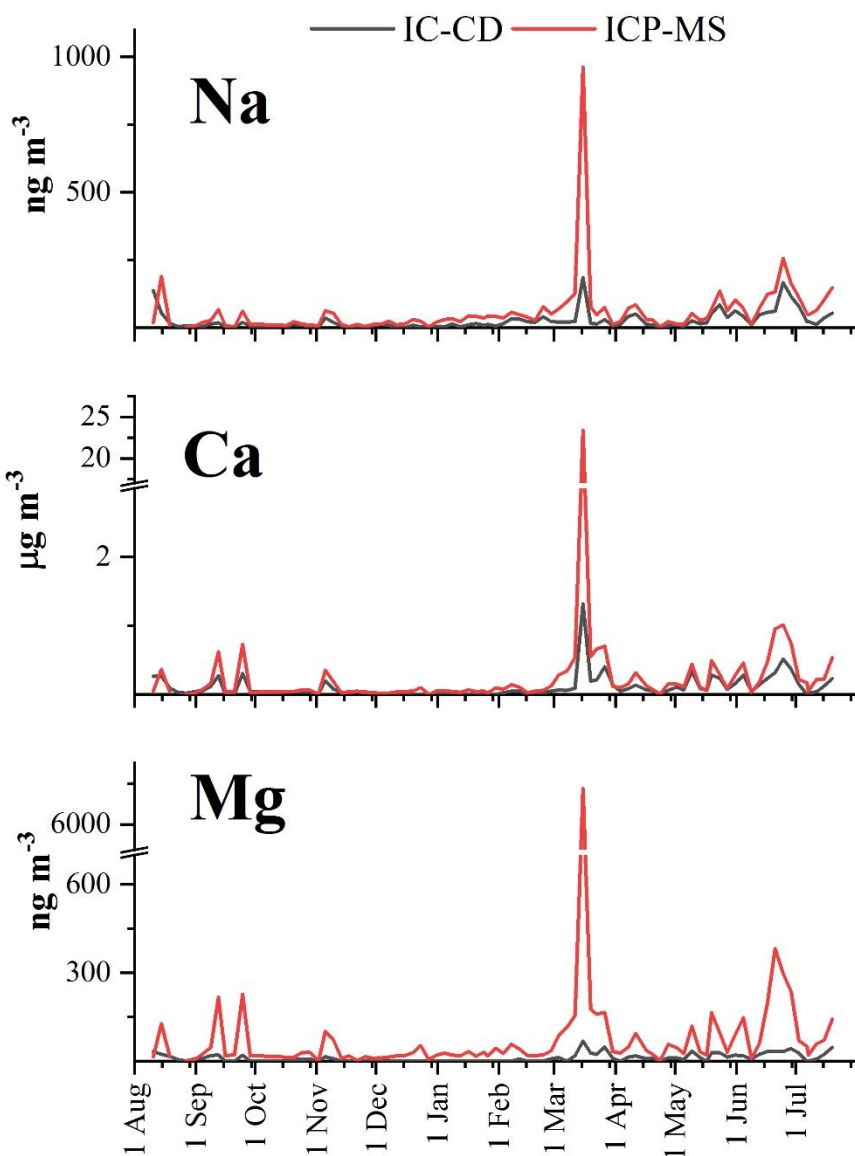

Figure S3. Comparison of sodium, calcium and magnesium concentrations performed using ion chromatography with conductivity detector (IC-CD) and inductively coupled plasma sector field mass spectrometry (ICP-SFMS).

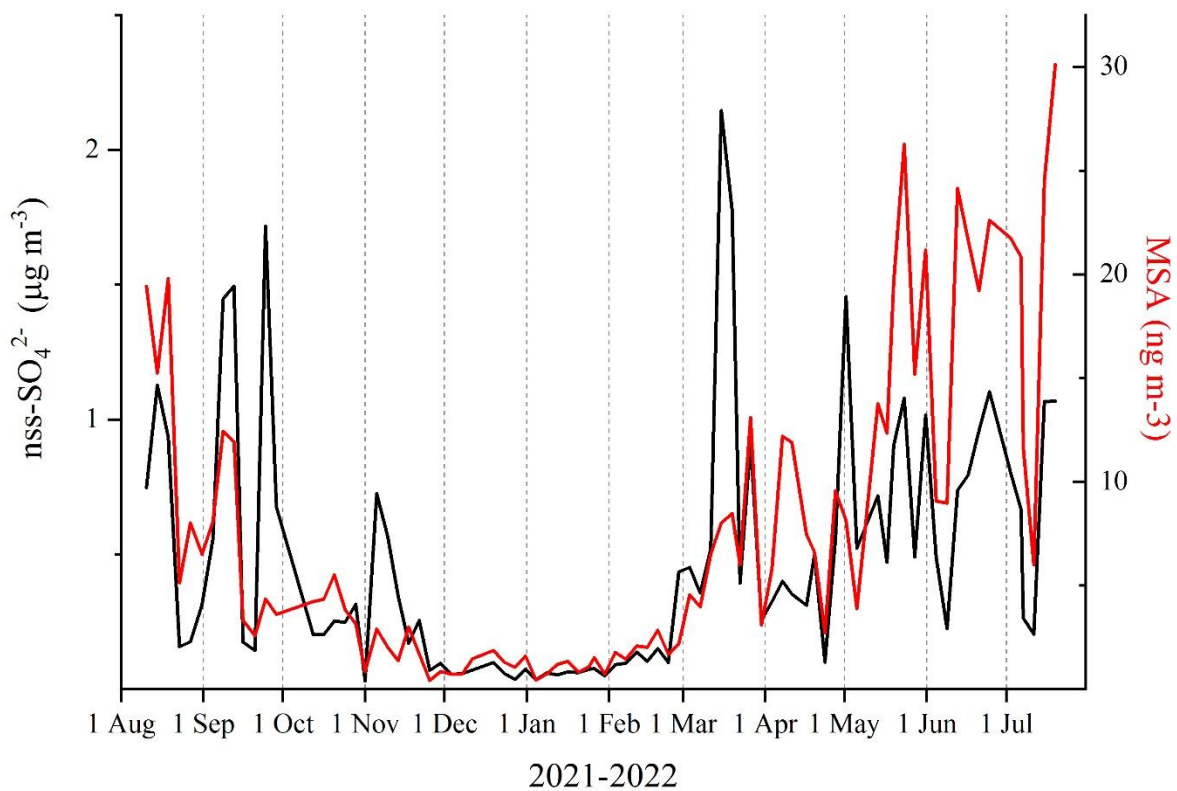

Figure S4. Comparison of non-sea salt sulfate (nss-SO<sub>4</sub><sup>2-</sup>) and methansulfonic acid (MSA) during the entire sampling year at Col Margherita Observatory.

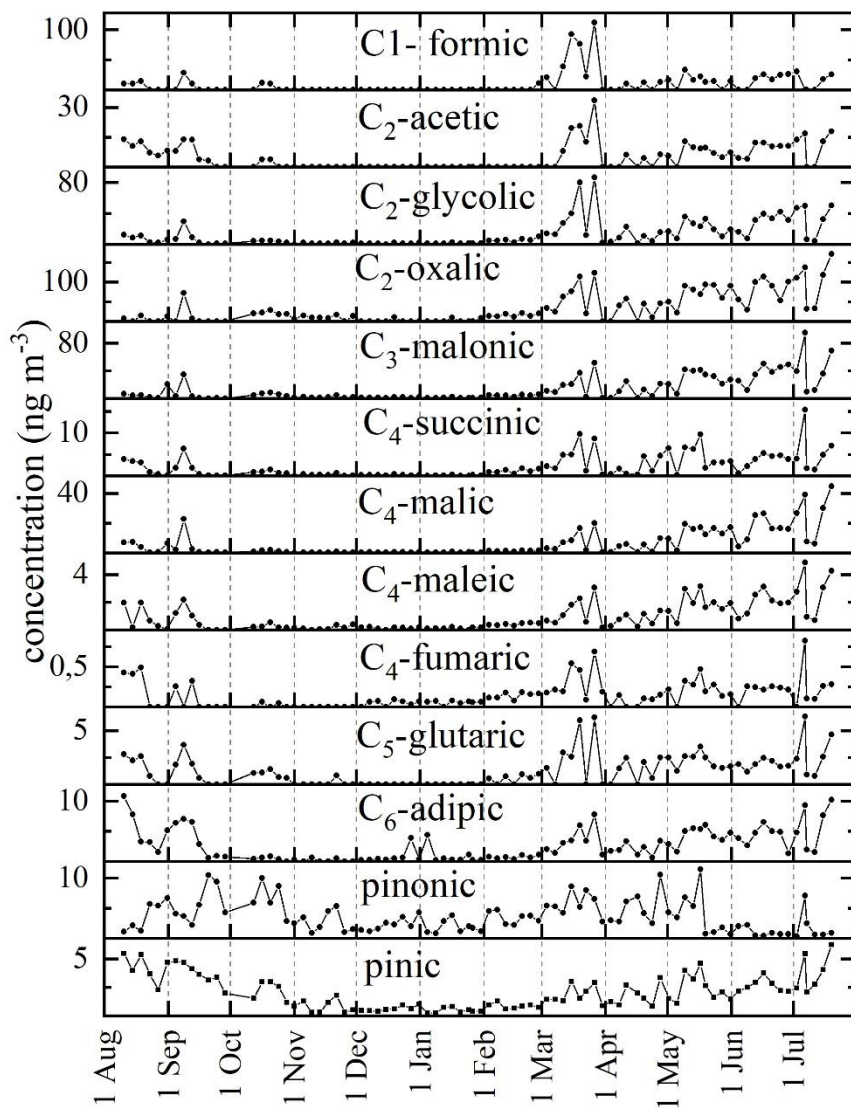

Figure S5. Annual trend of organic acids in the aerosol collected at MRG between August 2021 and July 2022

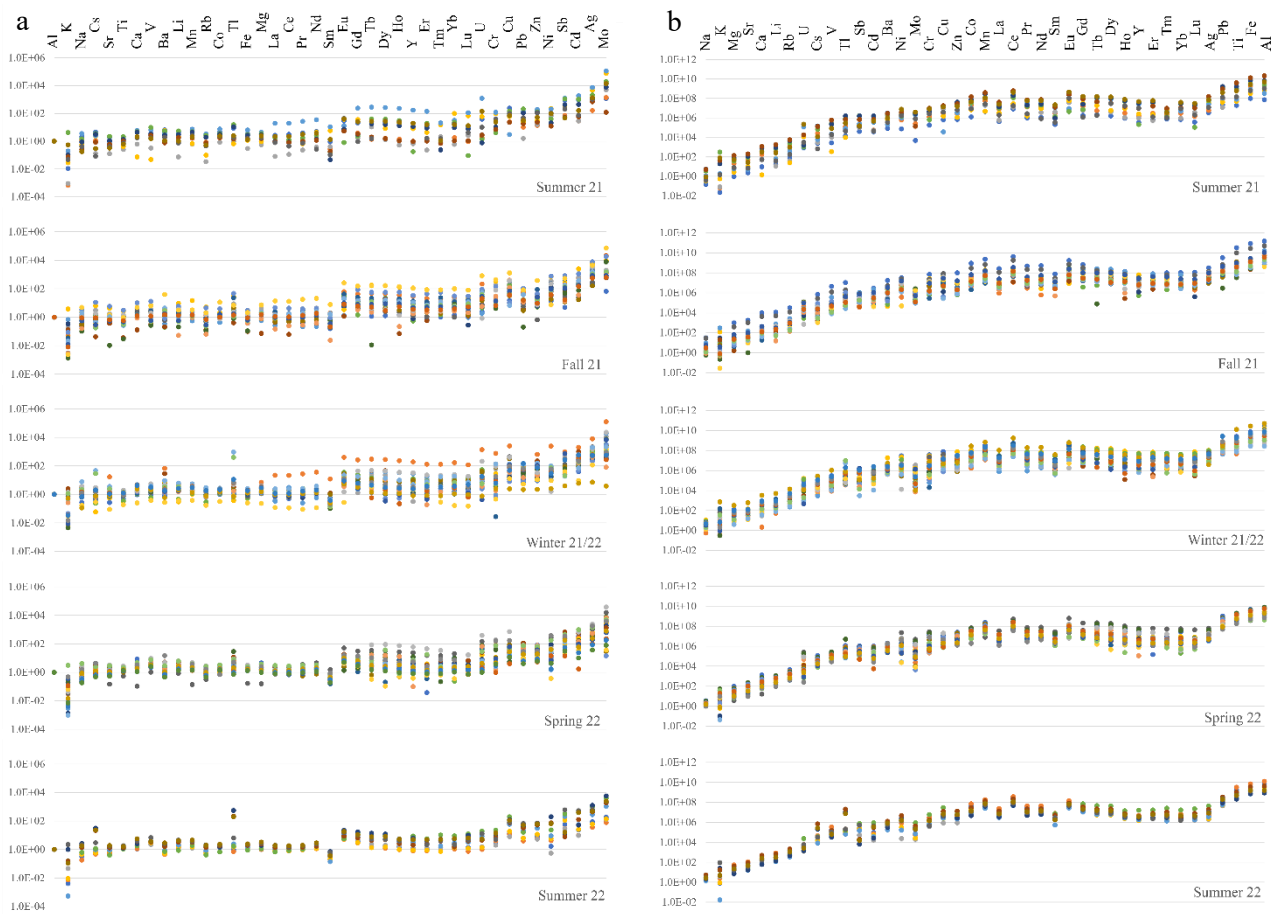

**Figure S6.** (a) EFs: enrichment factors calculated using Al as reference element. (b) MEFs: marine enrichment factors calculated using ssCa as reference element.

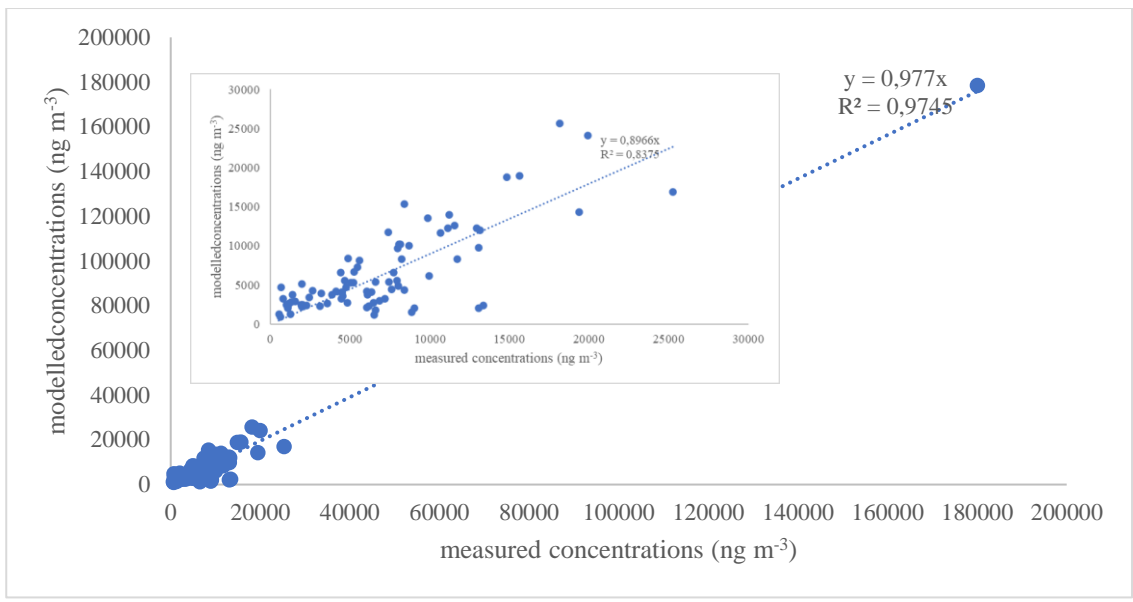

**Figure S7.** Comparison between measured and modelled concentrations obtained with PMF approach. In the box inside, the outlier point of Saharan Dust was excluded to evaluate the quality of reconstruction without the artifact due to the outlier point.



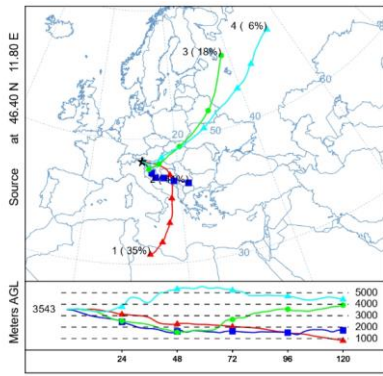

10-14 August

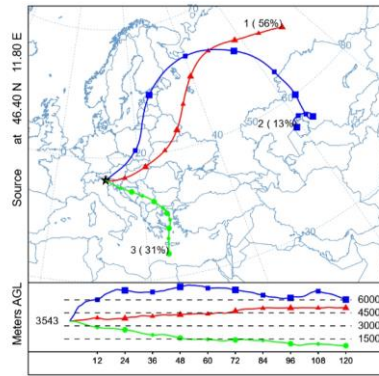

14-18 August

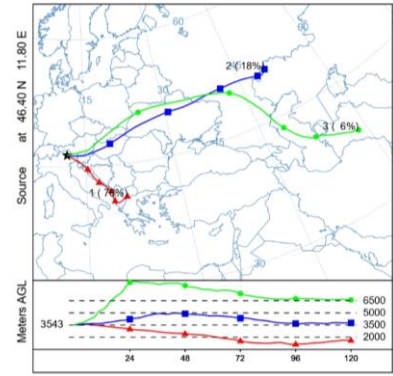

18-22 August

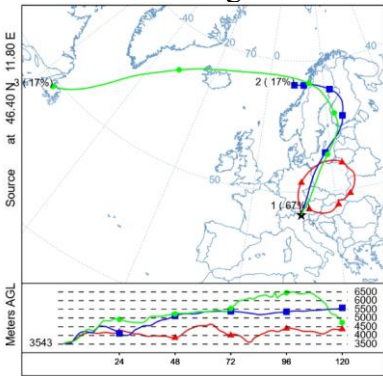

27-31 August

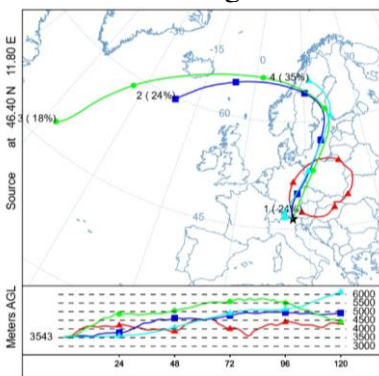

31 August - 4 September

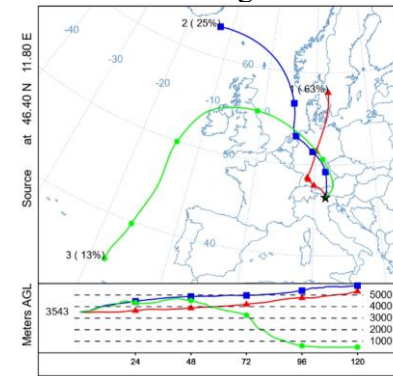

4-8 September

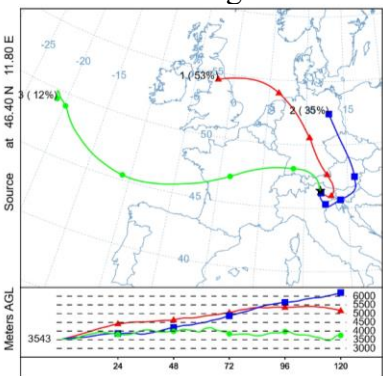

8-12 September

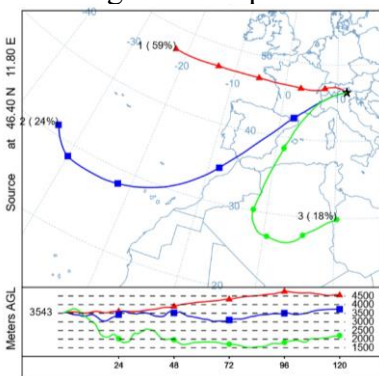

12-16 September

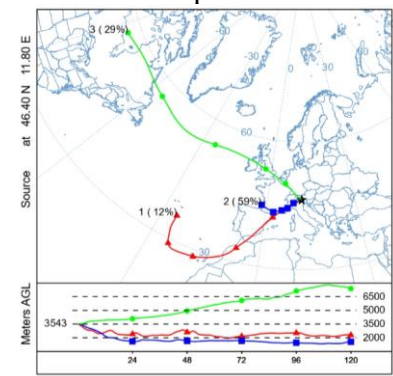

16-20 September

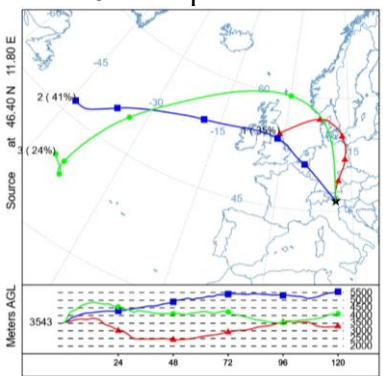

20-24 September

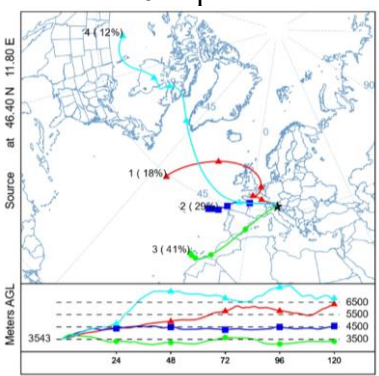

24-28 September

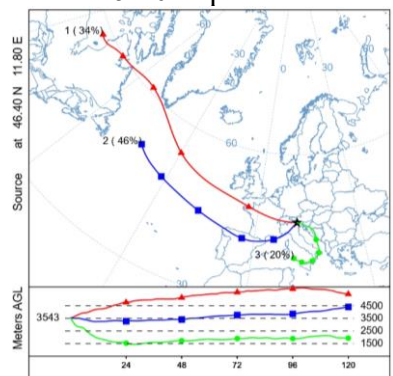

28 September - 10 October

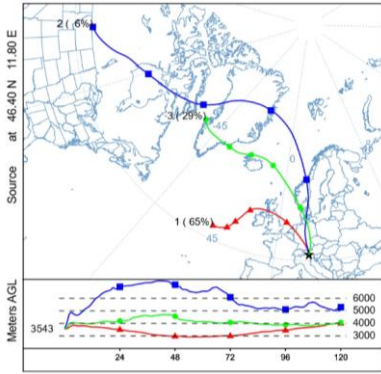

12-16 October

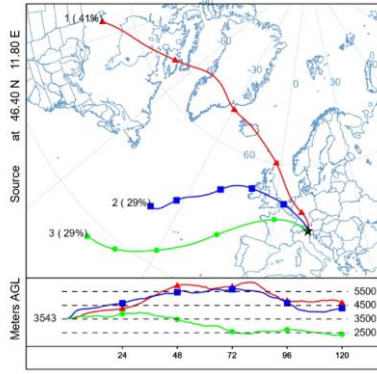

16-20 October

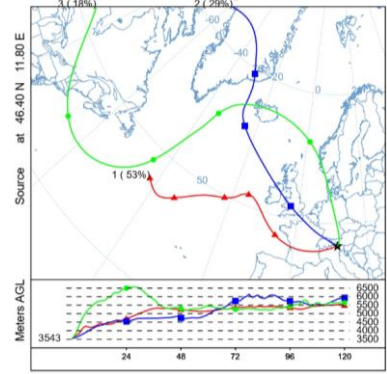

20-24 October

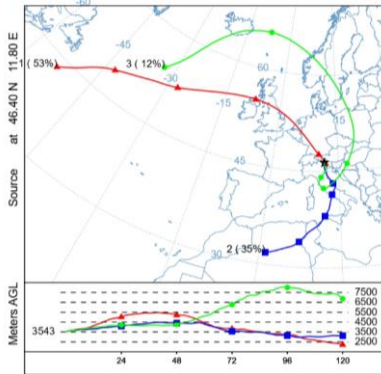

24-28 October

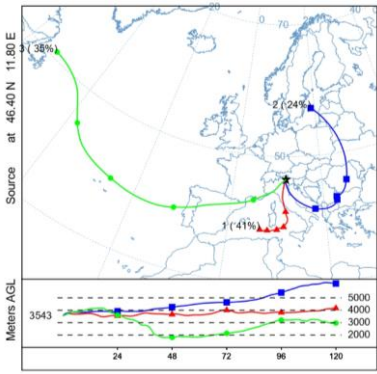

28 October - 1 November

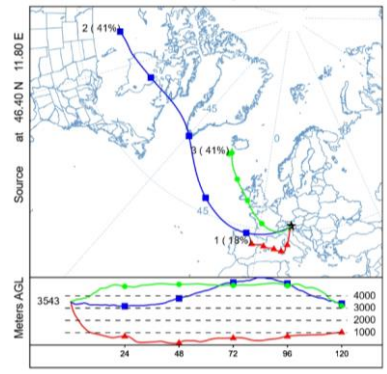

1-5 November

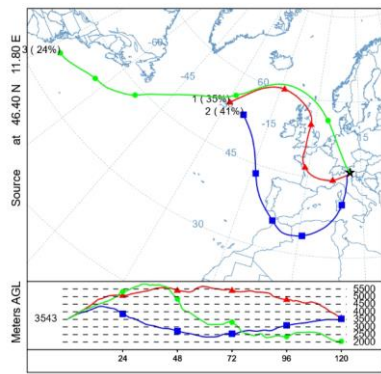

5-9 November

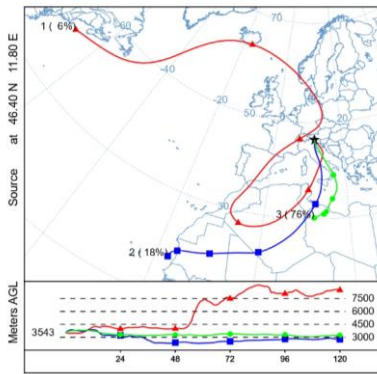

9-13 November

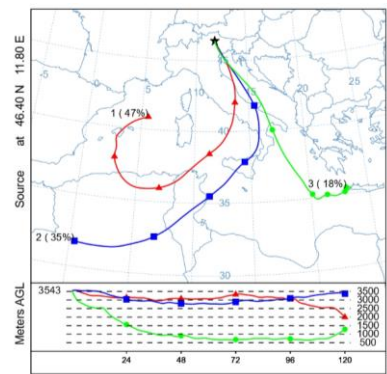

13-17 November

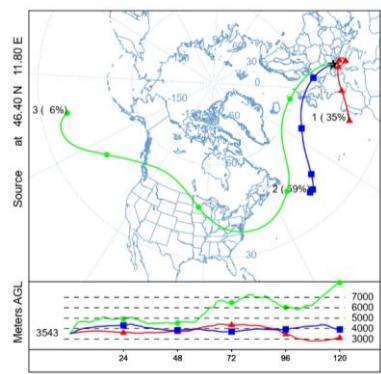

17-21 November

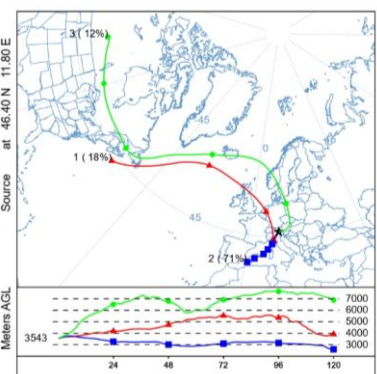

21-25 November

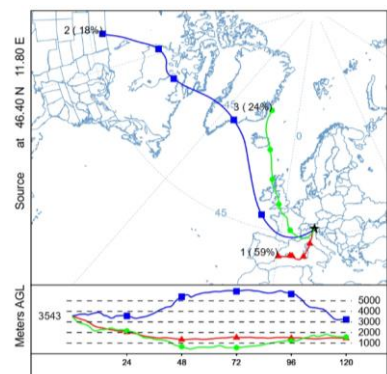

25-29 November

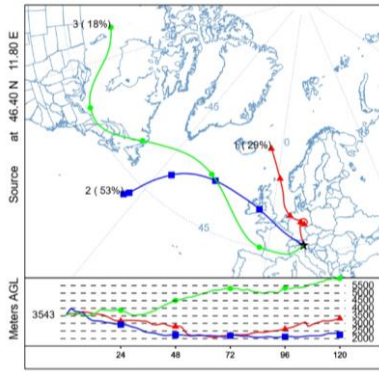

29 November – 3 December

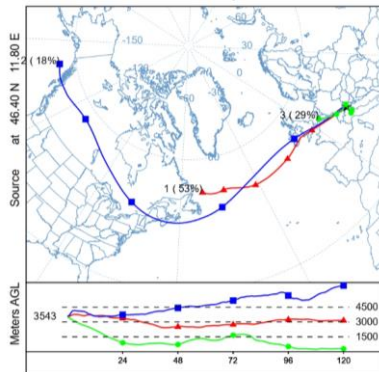

3-7 December

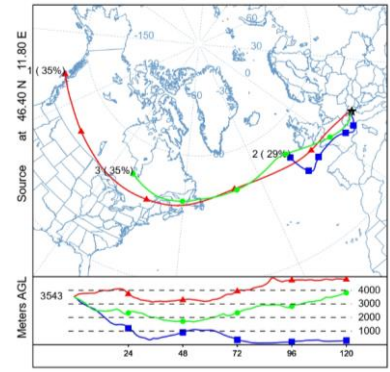

7-11 December

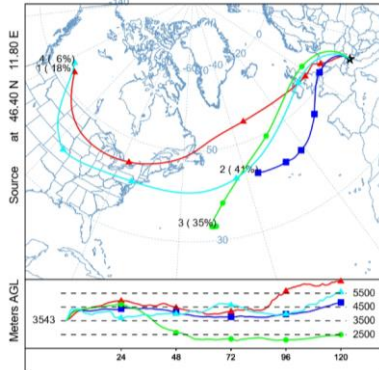

11-15 December

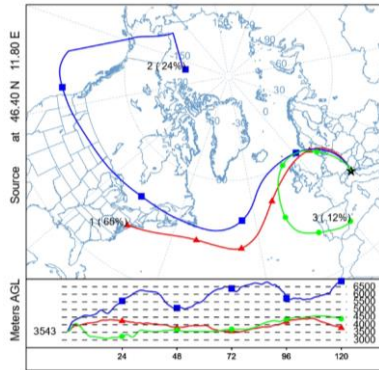

15-19 December

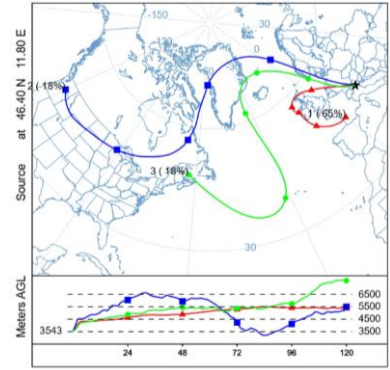

19-23 December

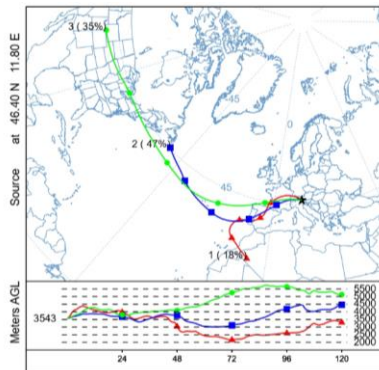

23-27 December

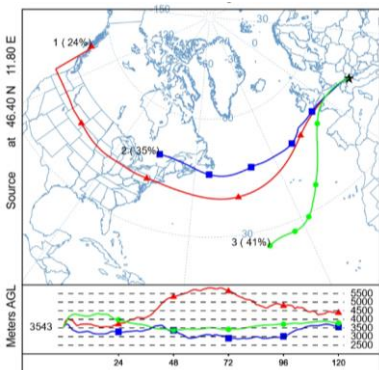

27-31 December

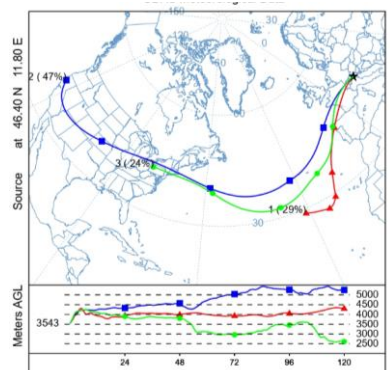

31 December – 4 January

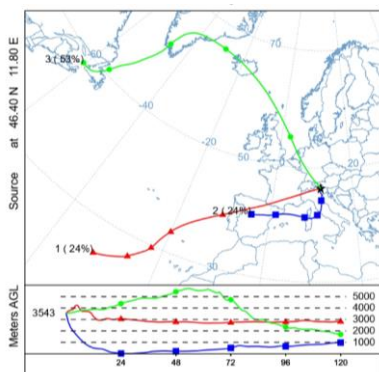

4-8 January

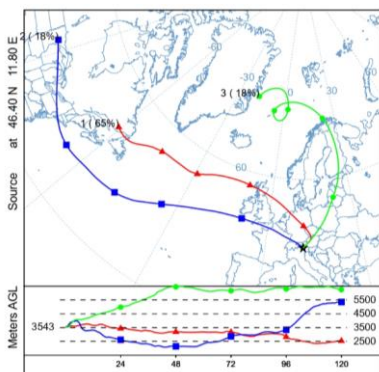

8-12 January

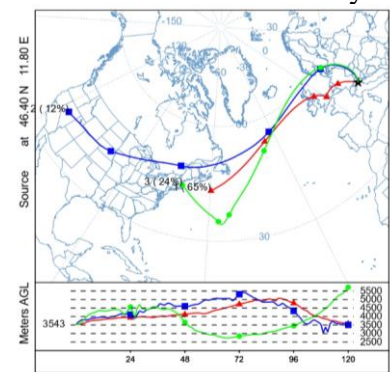

12-16 January

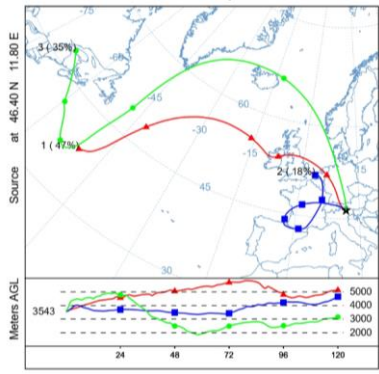

16-20 January

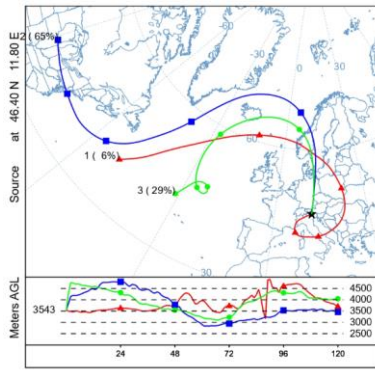

20-24 January

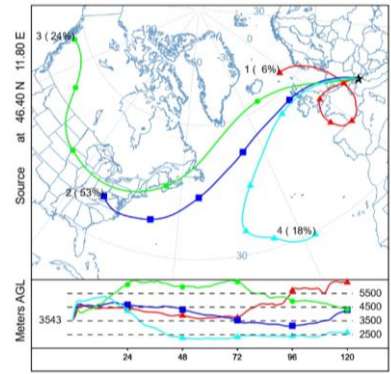

26-30 January

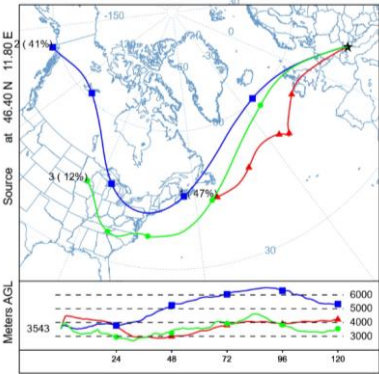

30 January - 3 February

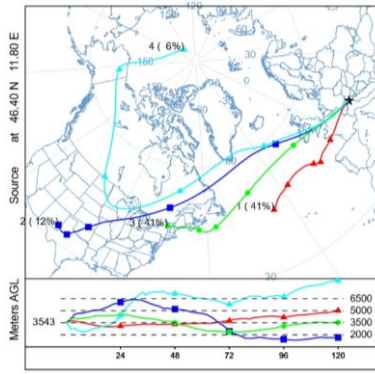

3-7 February

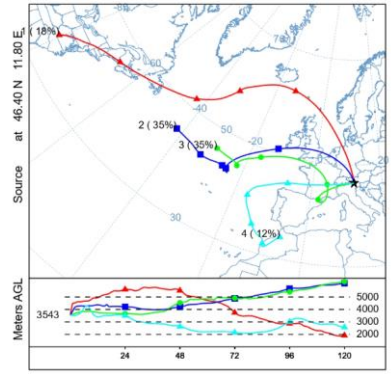

7-11 February

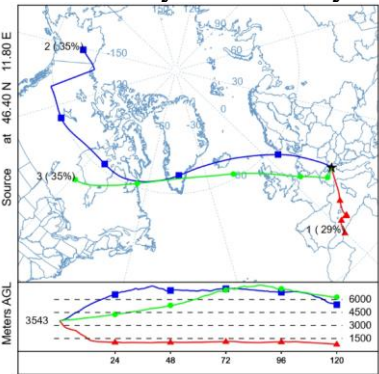

11-15 February

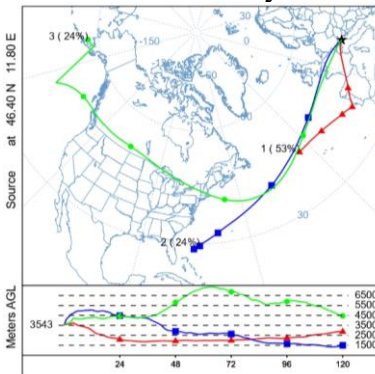

15-19 February

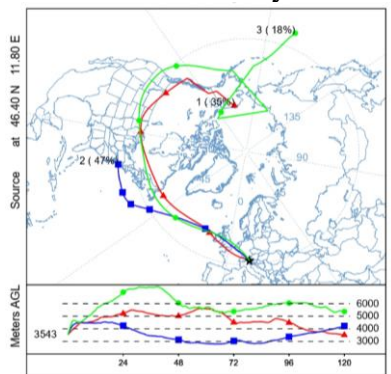

19-23 February

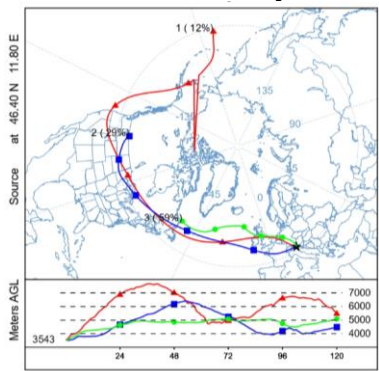

23-27 February

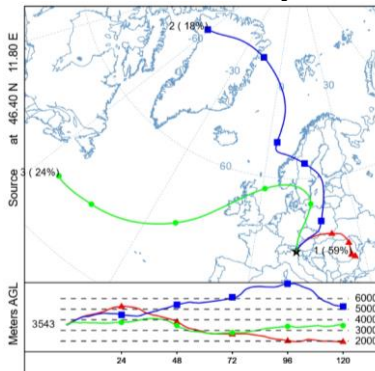

27 February - 3 March

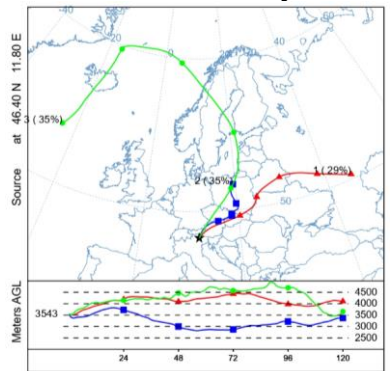

3-7 March

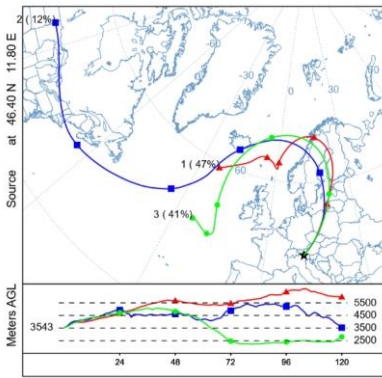

7-11 March

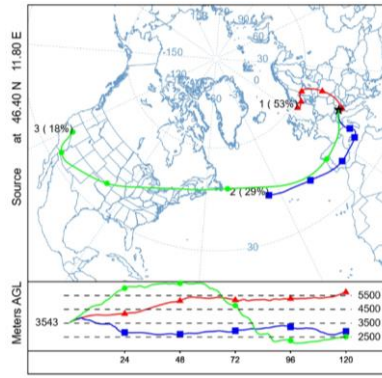

11-15 March

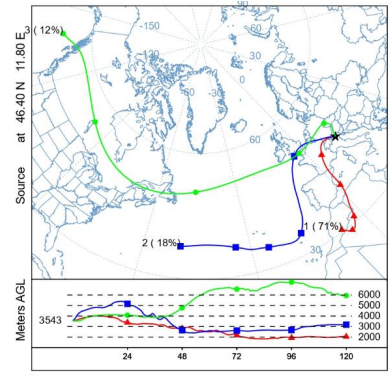

15-19 March

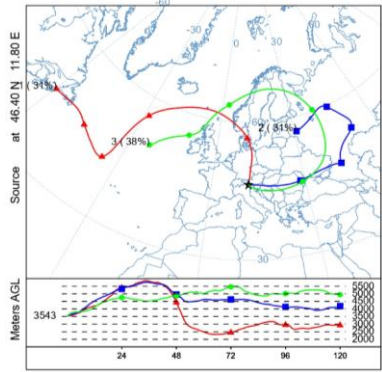

19-22 March

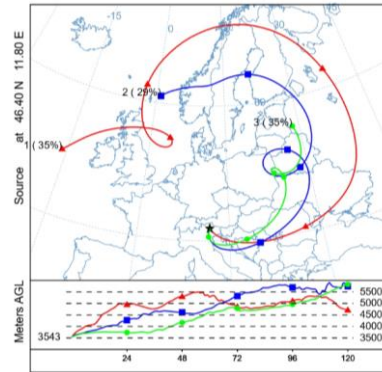

22-26 March

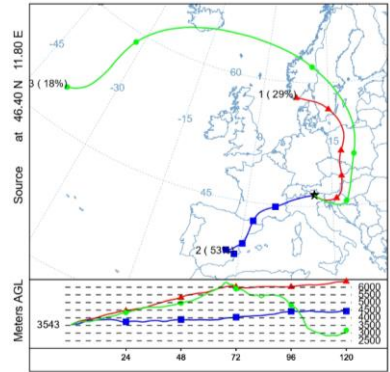

26-30 March

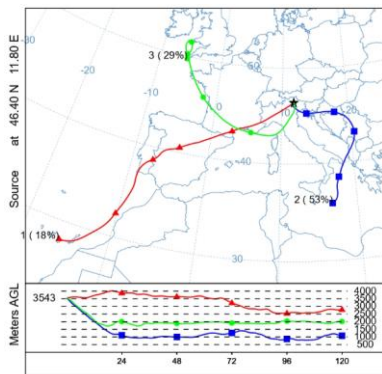

30 March - 3 April

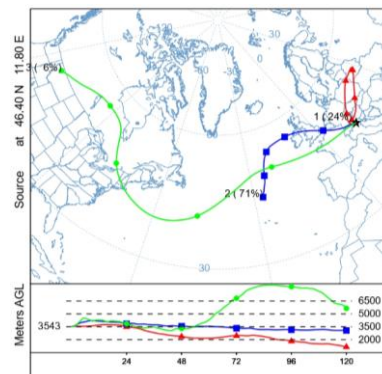

3-7 April

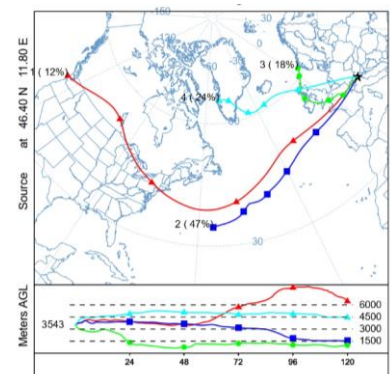

7-11 April

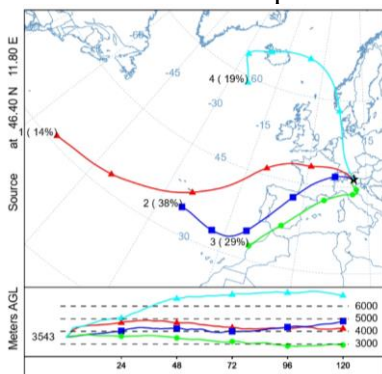

11-16 April

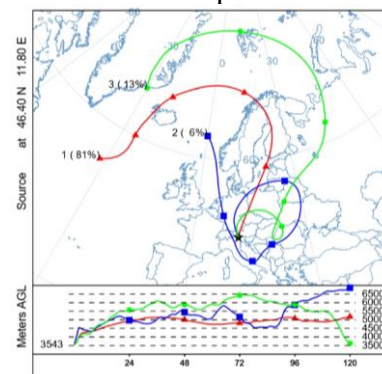

16-19 April

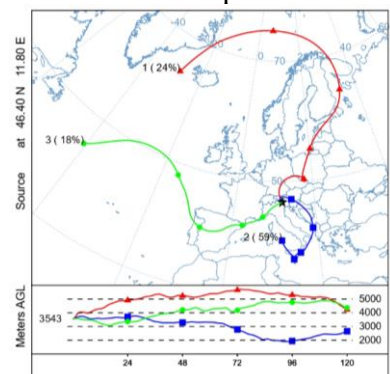

19-23 April

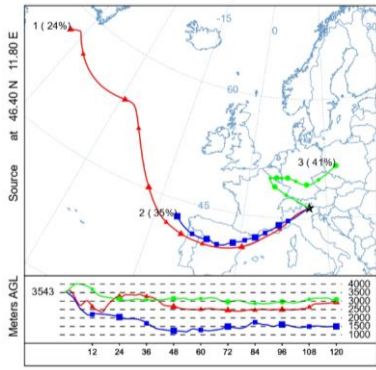

23-27 April

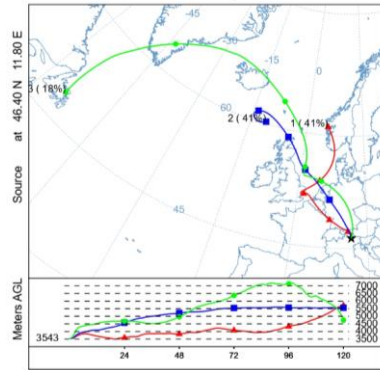

27 April - 1 May

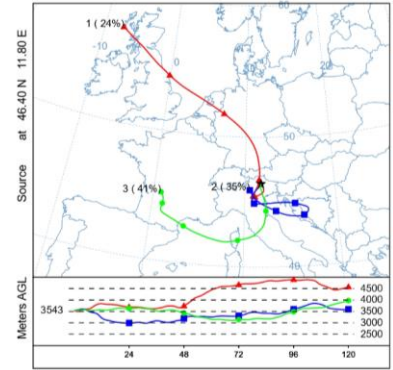

1-5 May

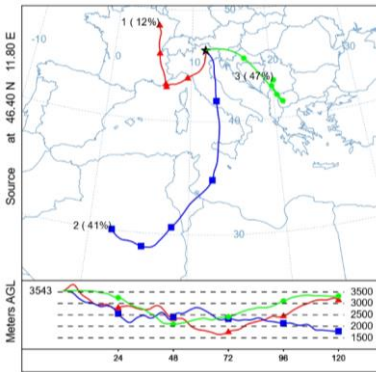

5-9 May

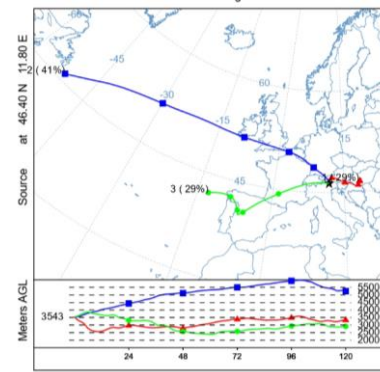

9-13 May

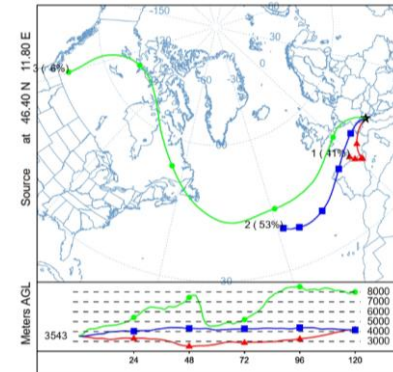

13-17 May

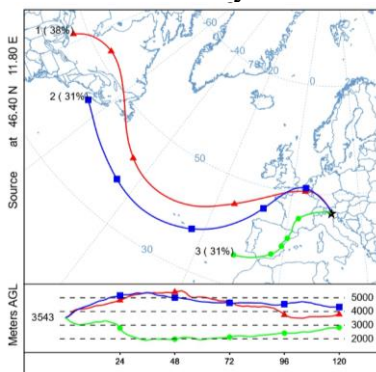

17-19 May

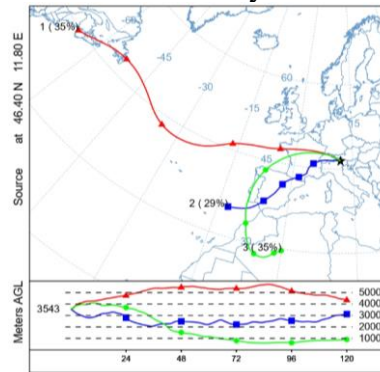

19-23 May

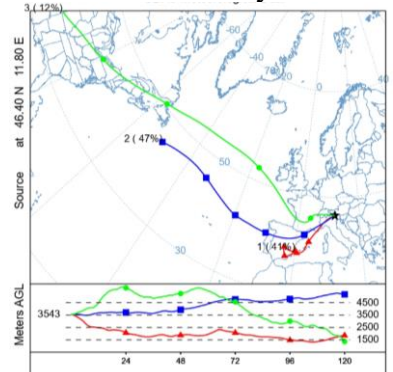

23-27 May

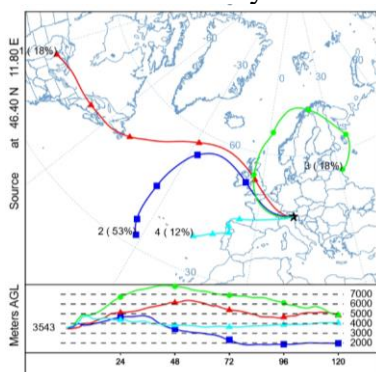

27-31 May

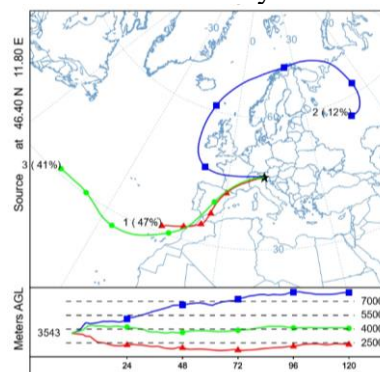

31 May - 4 June

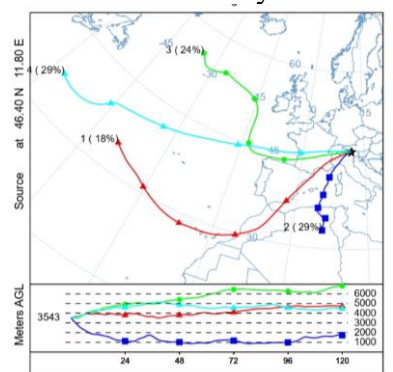

4-8 June

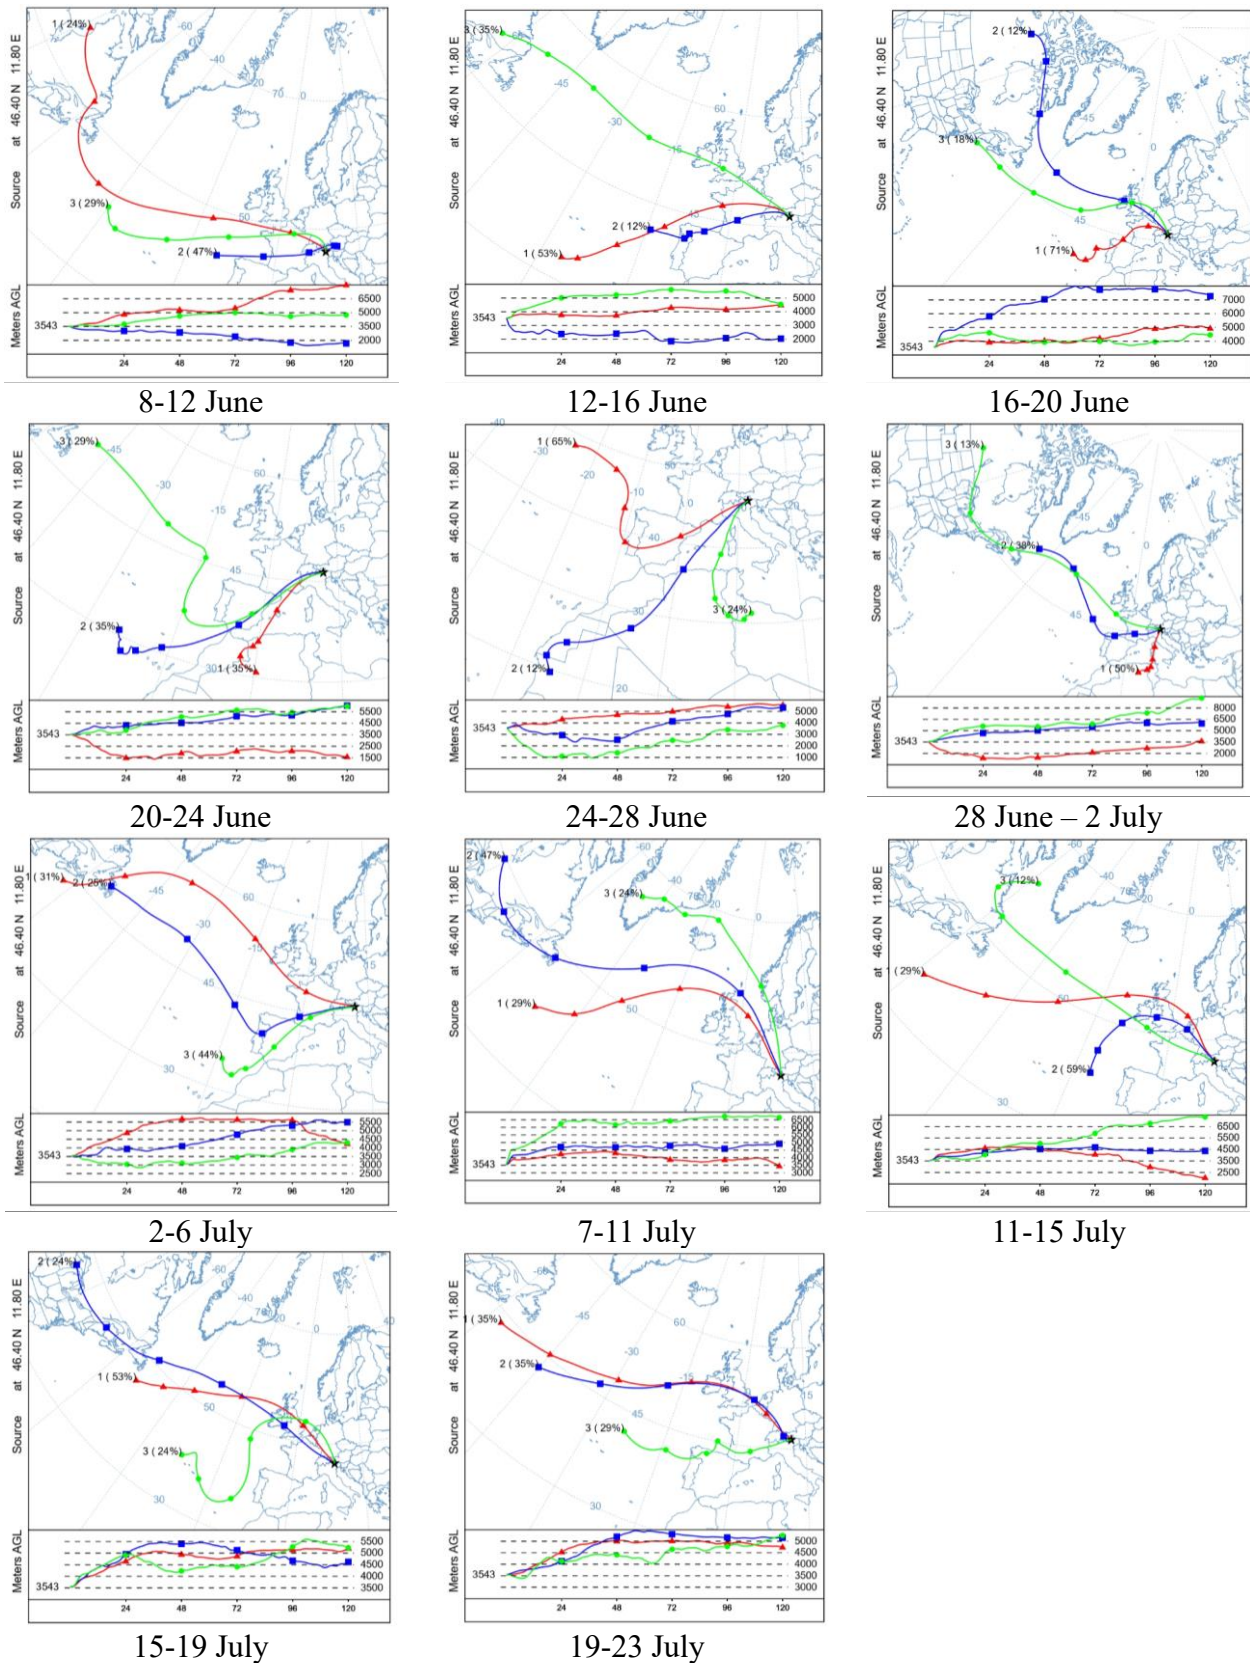

Figure S8. 5-days back-trajectories of air masses calculated for each sample. The starting point is considered the elevation of Col Margherita Station plus 1000 m in to avoid the surrounding orography.

Table S1. Linearity of each species plotted the observed data with the modelled ones.

| Species                       | Intercept | Slope  | R <sup>2</sup> |
|-------------------------------|-----------|--------|----------------|
| PM <sub>10</sub>              | 533.497   | 0.757  | 0.961          |
| Na <sup>+</sup>               | -3.036    | 0.802  | 0.440          |
| Na                            | -40.600   | 1.666  | 0.921          |
| NH <sub>4</sub> <sup>+</sup>  | 42.962    | 0.502  | 0.700          |
| K <sup>+</sup>                | 1.018     | 0.688  | 0.615          |
| Mg <sup>2+</sup>              | -2.301    | 1.095  | 0.566          |
| Mg                            | 31.087    | 0.480  | 0.984          |
| Ca <sup>2+</sup>              | -13.345   | 0.838  | 0.854          |
| Cl <sup>-</sup>               | 2.757     | 0.386  | 0.780          |
| NO <sub>3</sub> <sup>-</sup>  | 65.848    | 0.179  | 0.290          |
| SO <sub>4</sub> <sup>2-</sup> | 116.850   | 0.538  | 0.508          |
| MSA <sup>-</sup>              | 0.315     | 0.852  | 0.845          |
| Br <sup>-</sup>               | 0.370     | 0.511  | 0.446          |
| CA                            | 11.724    | 0.373  | 0.596          |
| D-FAA                         | 0.148     | 0.501  | 0.655          |
| L-FAA                         | 0.368     | 0.647  | 0.594          |
| PC                            | 0.086     | 0.053  | 0.171          |
| PDαP                          | 2.571     | 0.201  | 0.073          |
| Levoglucozan                  | 0.703     | 0.082  | 0.290          |
| Mannitol                      | 0.137     | 0.430  | 0.505          |
| Glucose                       | 0.263     | 0.459  | 0.560          |
| Ti                            | 4.832     | 0.347  | 0.988          |
| Mn                            | 0.938     | 0.624  | 0.992          |
| Mo                            | 1.670     | 0.076  | 0.054          |
| Cu                            | -1.991    | 1.648  | 0.388          |
| Pb                            | -0.287    | 1.018  | 0.581          |
| V                             | 0.125     | 0.477  | 0.992          |
| U                             | 0.012     | 0.398  | 0.425          |
| Ag                            | 0.047     | -0.011 | 0.004          |
| Sb                            | 0.018     | 0.151  | 0.299          |
| Fe                            | 56.711    | 0.407  | 0.989          |
| La                            | 0.042     | 0.460  | 0.990          |
| Ce                            | 0.087     | 0.448  | 0.989          |
| Sm                            | 0.007     | 0.597  | 0.991          |
| Eu                            | 0.002     | 0.443  | 0.983          |
| Ho                            | -0.0003   | 0.662  | 0.951          |
| Yb                            | 0.003     | 0.462  | 0.971          |
